# Supplementary material for: Empirical Evidence Supporting Frequent Cryptic Speciation in Epiphyllous Liverworts: A Case Study of the Cololejeunea lanciloba Complex
Source: PubMed Central journal article supplement (PMC3867491; doi:10.1371/journal.pone.0084124), 2013-12-18

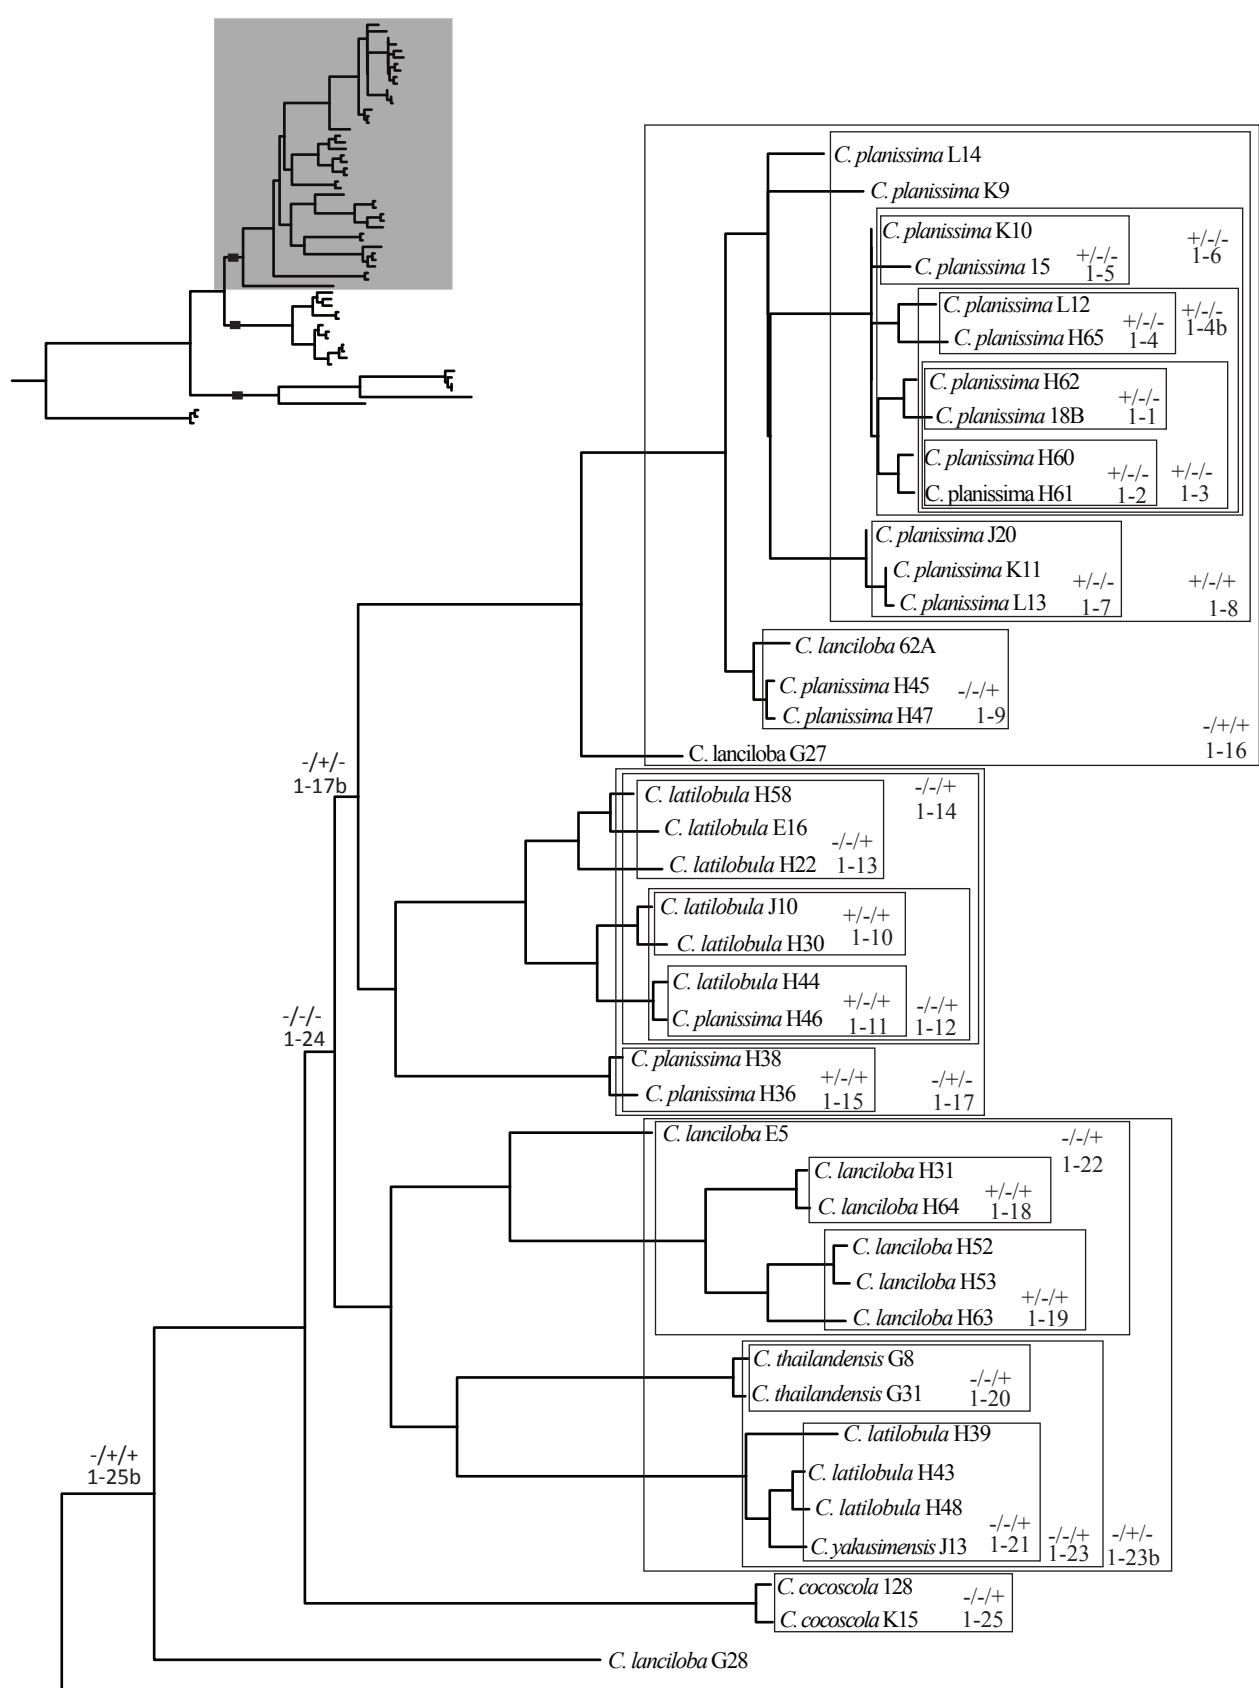

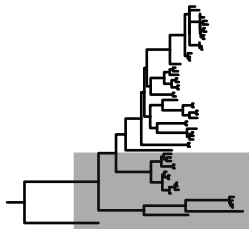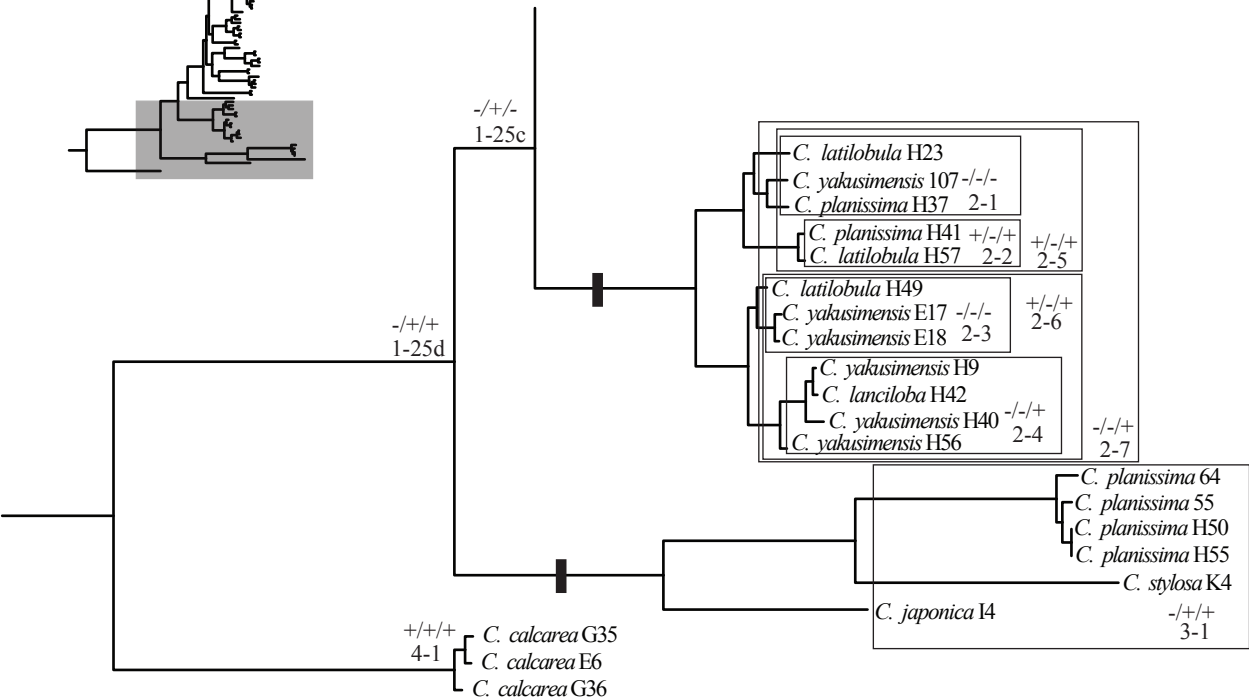

Supplement: pone.0084124.s003.pdf [file pone.0084124.s003.pdf]
